# Supplementary material
Source: publisher site journal article supplement (https://www.dovepress.com/article/460922)
Supplement: Supplementary file 1 [file get_supplementary_file.php]

**Table S1.** Therapeutic response

| Evaluation (RECIST v1.1) | All patients  (*n* = 63) | Evaluation (mRECIST) | All patients  (*n* = 63) |
| --- | --- | --- | --- |
| Complete response, *n* (%) | 0 (0) | Complete response, *n* (%) | 4 (6.3) |
| Partial response, *n* (%) | 16 (25.4) | Partial response, *n* (%) | 32 (50.8) |
| Stable disease, *n* (%) | 39 (61.9) | Stable disease, *n* (%) | 19 (30.2) |
| Progression disease, *n* (%) | 8 (12.7) | Progression disease, *n* (%) | 8 (12.7) |
| Objective response rate, (%) | 25.4 | Objective response rate, (%) | 57.1 |
| Disease control rate, (%) | 87.3 | Disease control rate, (%) | 87.3 |

**Table S2.** Univariate analysis of factors that influenced OS and PFS.

| Characteristics | Overall survival | | | Progression-free survival | | |
| --- | --- | --- | --- | --- | --- | --- |
| HR | 95% CI | *p-*value | HR | 95% CI | *p-*value |
| Sex  (male/female) | 1.062 | 0.398-2.831 | 0.905 | 0.983 | 0.431-2.239 | 0.967 |
| Age  (<60 /≥60 years) | 1.089 | 0.481-2.466 | 0.837 | 0.811 | 0.409-1.608 | 0.548 |
| Child-Pugh classification (A/B) | 2.667 | 0.987-7.210 | 0.053 | 2.935 | 1.253-6.875 | 0.013 |
| Aetiology of HCC (Hepatitis B/  non-B, non-C) | 0.704 | 0.210-2.357 | 0.569 | 0.795 | 0.281-2.246 | 0.664 |
| AFP  (<400/≥400 ng/ml ) | 1.358 | 0.616-2.993 | 0.447 | 0.958 | 0.505-1.819 | 0.896 |
| BCLC  (A+B/C) | 3.953 | 1.348-11.593 | 0.012 | 2.555 | 1.197-5.453 | 0.015 |
| Platelet count  (<162/≥162 *109/L) | 0.931 | 0.425-2.040 | 0.858 | 0.976 | 0.516-1.844 | 0.940 |
| Neutrophils  (<3.17/≥3.17 *109/L) | 1.395 | 0.632-3.080 | 0.410 | 1.400 | 0.737-2.659 | 0.303 |
| Lymphocytes  (<1.10/≥1.10 *109/L) | 1.190 | 0.542-2.617 | 0.664 | 1.345 | 0.706-2.562 | 0.368 |
| Early AFP response  (Yes/no) | 3.656 | 1.658-8.061 | 0.001 | 2.203 | 1.122-4.324 | 0.022 |
| AFP response  (Yes/no) | 6.428 | 1.881-21.967 | 0.003 | 3.217 | 1.485-6.970 | 0.003 |

HR, hazard ratio; CI, confidence interval; HCC, hepatocellular carcinoma; BCLC Barcelona Clinic Liver Cancer; AFP, alpha-fetoprotein; OS, overall survival; PFS, progression-free survival.

**Table S3**. Sequential therapy after progression

| Sequential therapy | All (*n* = 32) |
| --- | --- |
| Regorafenib, *n* | 5 |
| Tislelizumab, *n* | 1 |
| HAIC/TACE, *n* | 6 |
| HAIC/TACE plus Regorafenib, *n* | 2 |
| Ablation, *n* | 3 |
| Radiotherapy, *n* | 2 |
| BSC, *n* | 7 |
| Surgery, *n* | 1 |
| Unknown, *n* | 5 |

HAIC, hepatic arterial infusion chemotherapy; TACE, transarterial chemoembolization; BSC, best supportive care.
